# Supplementary material for: Exceptional retreat of Novaya Zemlya's marine-terminating outlet glaciers between 2000 and 2013
Source: Copernicus journal article supplement (doi:10.5194/tc-2017-32), 2017-05-15
Supplement: Supplementary file 1 [file tc-2017-32-supplement.pdf]

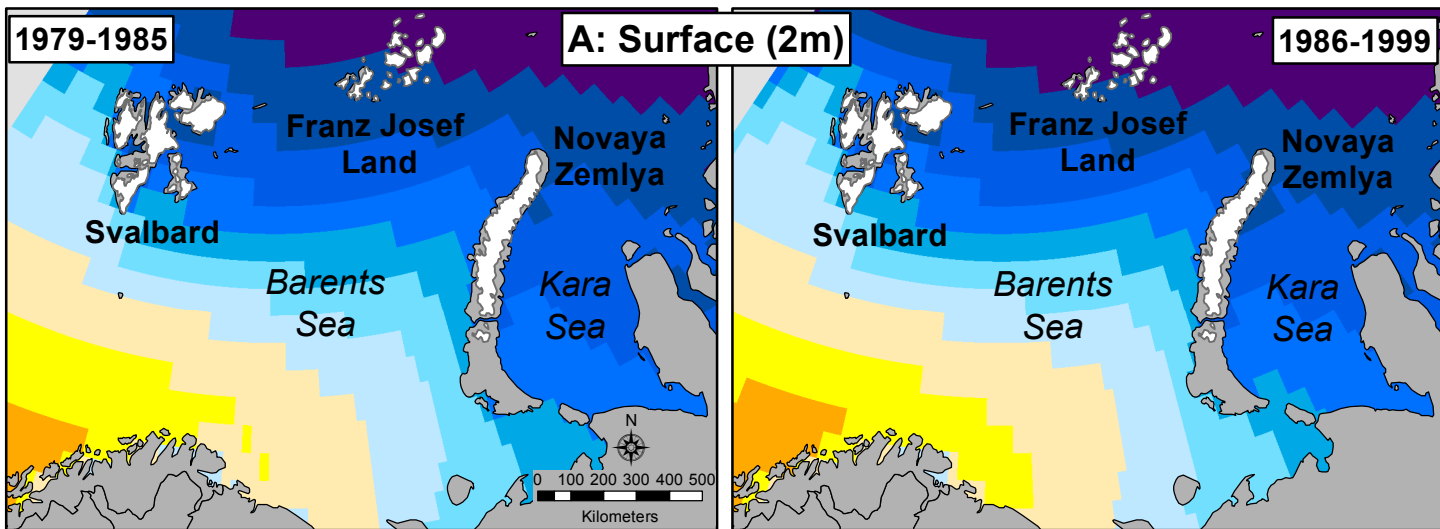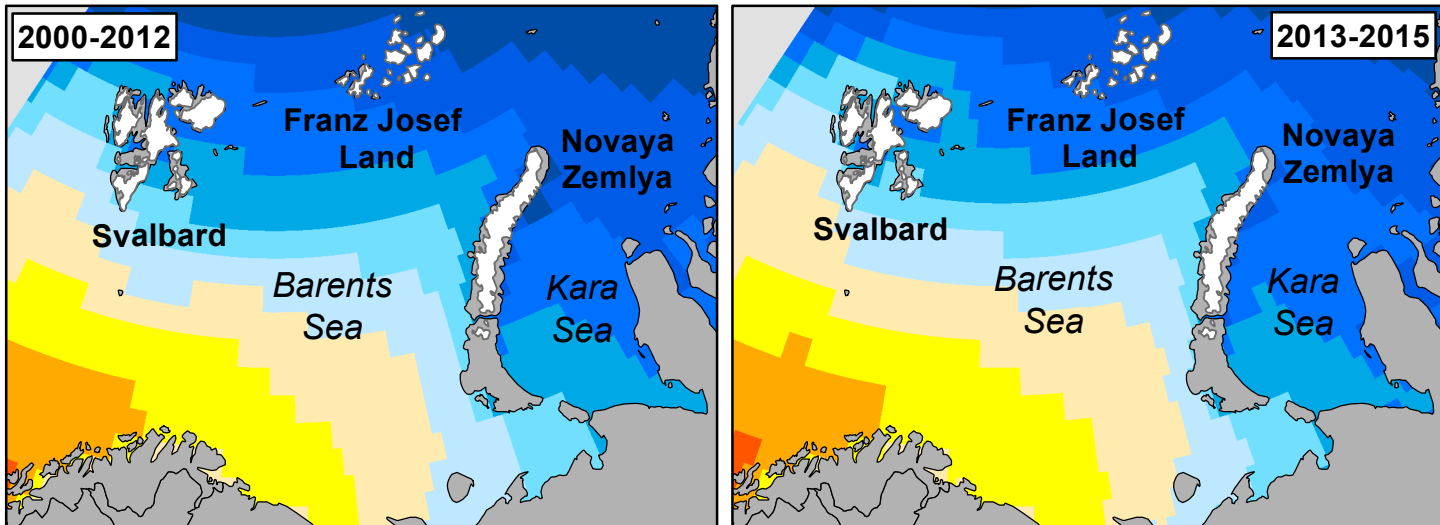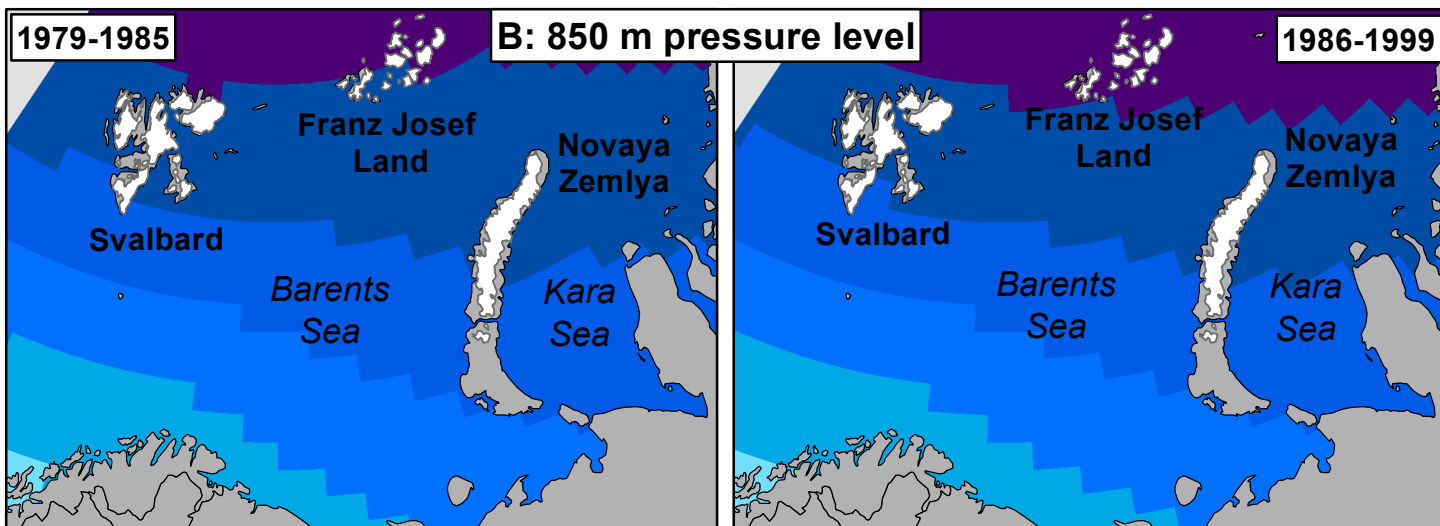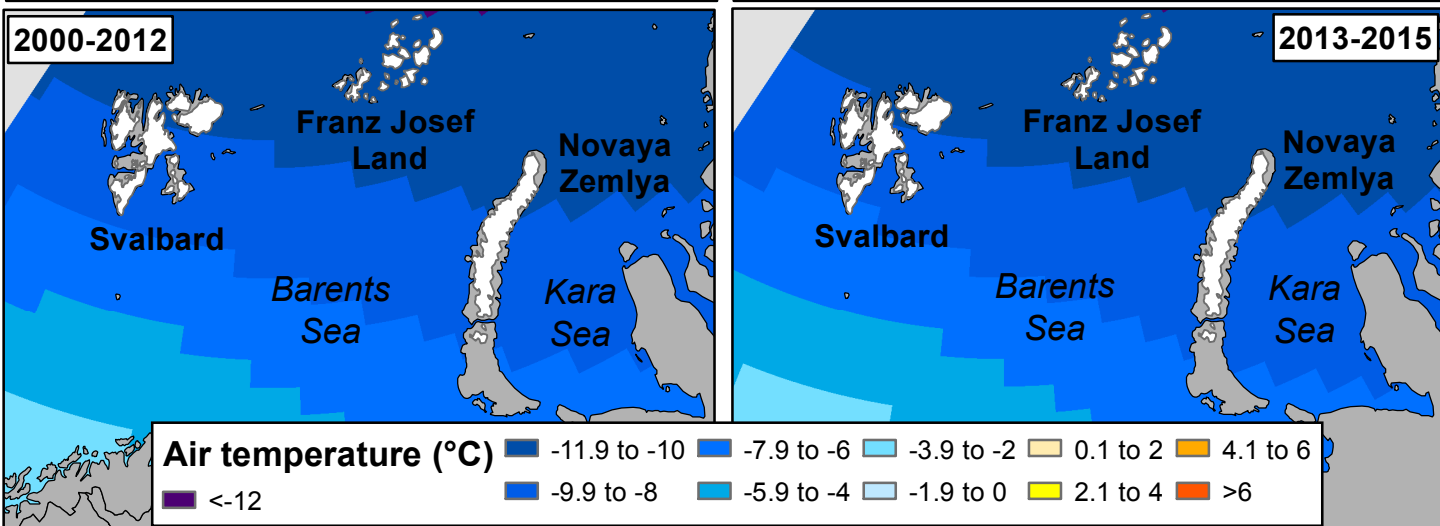

# Sea Ice – Barents

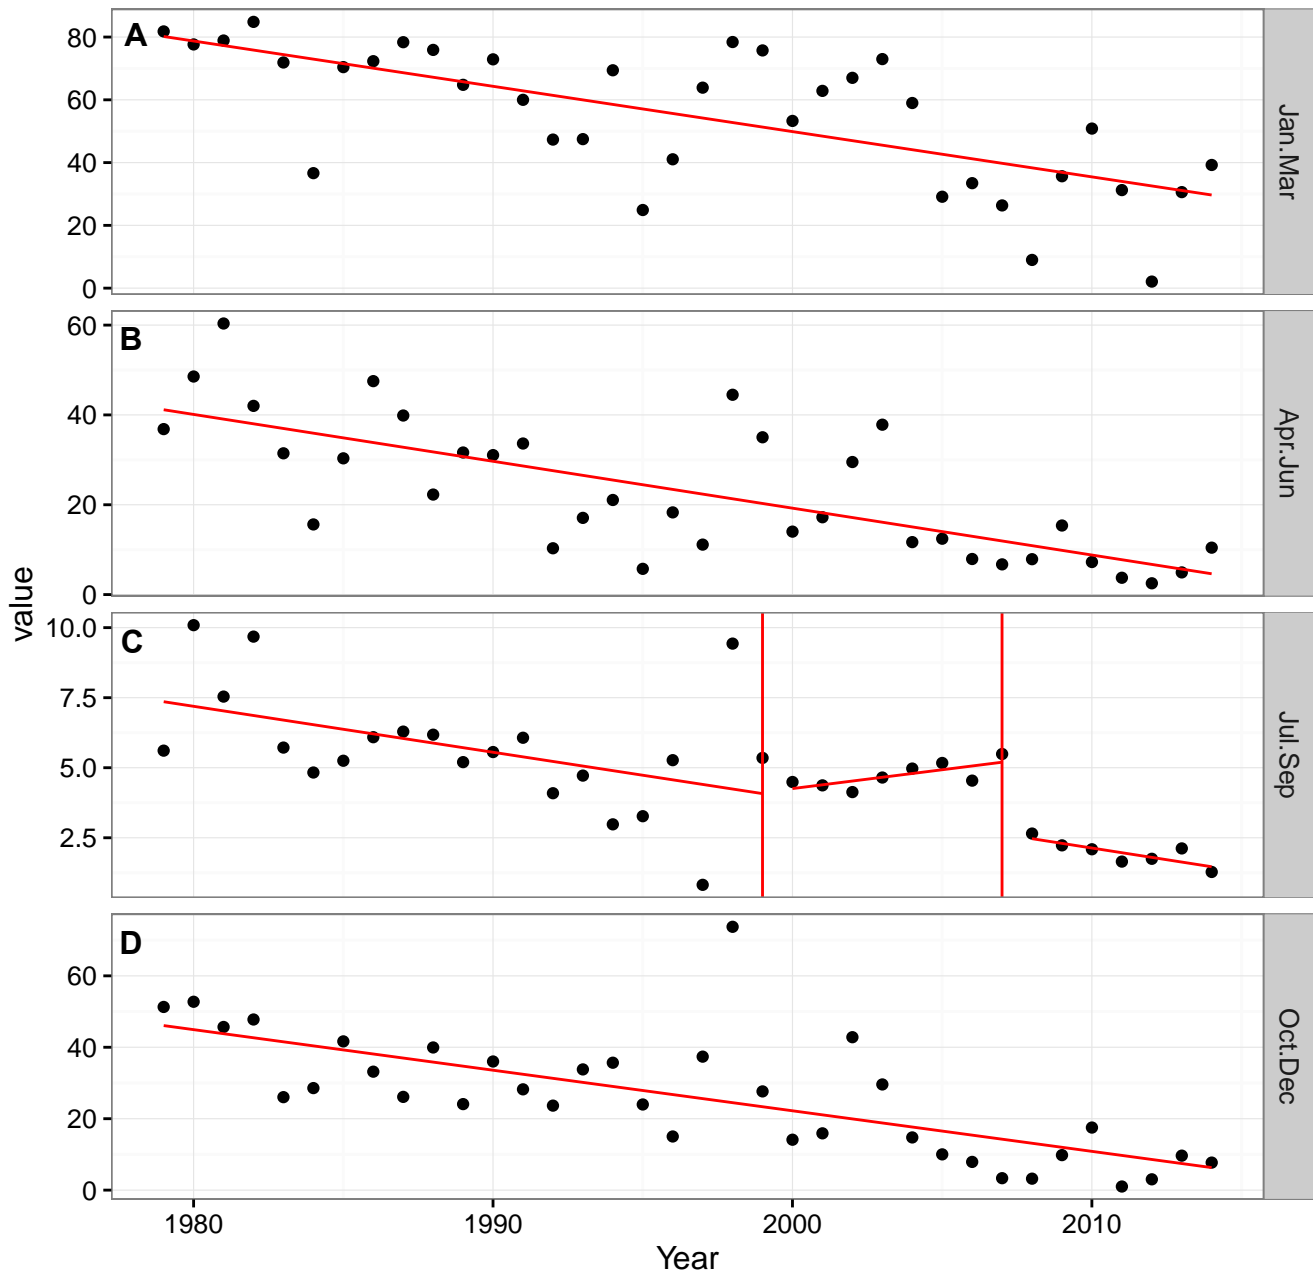

# Sea Ice – Kara

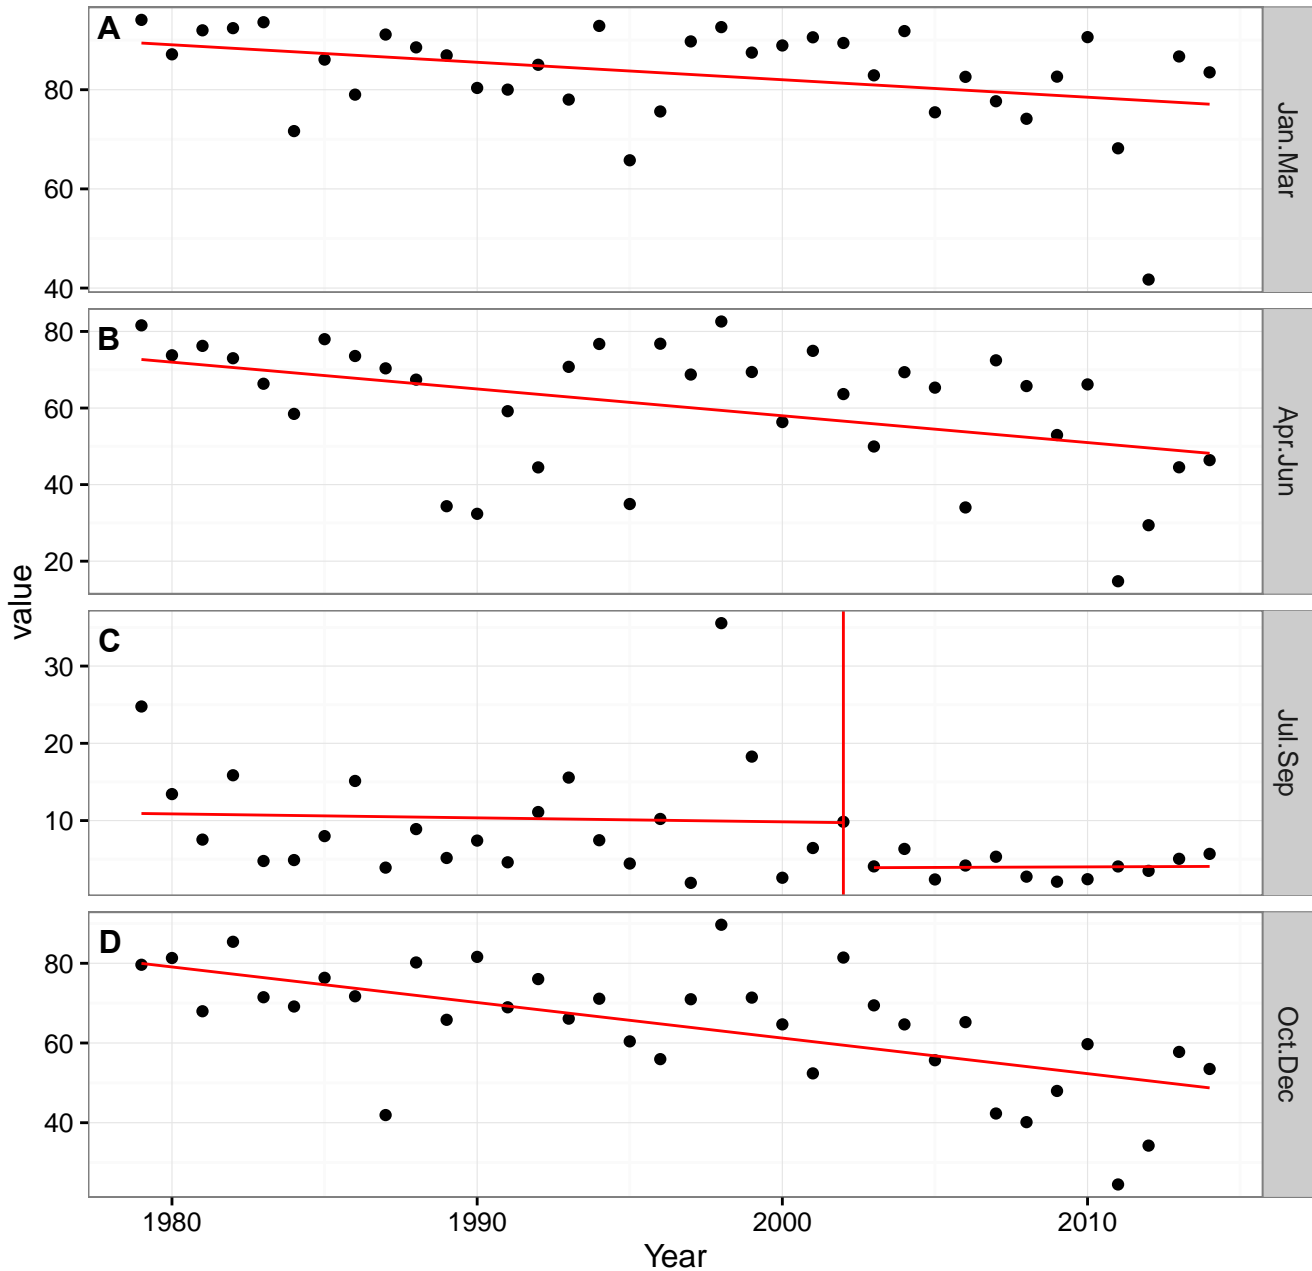

**Supplementary Figure 1.** Air temperatures from ERA-Interim reanalysis data at A) the surface (2 m) and B) 850 m pressure level, for the following time intervals: 1979-1985, 1986-1999, 2000-2012 and 2013-2015.

**Supplementary Figure 2.** Changepoint analysis of mean seasonal sea ice concentrations, between 1979 and 2015, on the Barents Sea coast of Novaya Zemlya. Black dots indicate seasonal means for each year, for A) Jan-Mar; B) Apr-May; C) Jul-Sep and; D) Oct-Dec. Red diagonal lines show the regression line fitted to the data and vertical red lines mark significant break points in the data, identified by the changepoint analysis.

**Supplementary Figure 3.** Changepoint analysis of mean seasonal sea ice concentrations, between 1979 and 2015, on the Kara Sea coast of Novaya Zemlya. Black dots indicate seasonal means for each year, for A) Jan-Mar; B) Apr-May; C) Jul-Sep and; D) Oct-Dec. Red diagonal lines show the regression line fitted to the data and vertical red lines mark significant break points in the data, identified by the changepoint analysis.
